# Supplementary material for: Influence of spatial camera resolution in high-speed videoendoscopy on laryngeal parameters
Source: PLOS journal article supplement (doi:10.1371/journal.pone.0215168), 2019-04-22
Supplement: S5 (10.1371/journal.pone.0215168.s005) [file journal.pone.0215168.s005]

## S2 Appendix

### PVI and AVI are independent of the order of their elements

We proof that  $PVI(\vec{T})$  and  $AVI(\vec{A})$  are independent of the order of the elements within  $\vec{T}$  or  $\vec{A}$ .

**THEOREM B:** Let  $N$  be an integer  $\geq 2$ , let  $\vec{A}$  and  $\vec{T}$  be vectors in  $\mathbb{R}^N$  in real numbers, which are component-wise greater than zero. Then:

- a)  $PVI(T_0, \dots, T_{N-1}) = PVI(T_{p(0)}, \dots, T_{p(N-1)})$  for any bijective  $p : \{0, \dots, N-1\} \rightarrow \{0, \dots, N-1\}$
- b)  $AVI(A_0, \dots, A_{N-1}) = AVI(A_{p(0)}, \dots, A_{p(N-1)})$  for any bijective  $p : \{0, \dots, N-1\} \rightarrow \{0, \dots, N-1\}$

Proof:

a) we define:

$$\bar{T} = \frac{1}{N} \sum_{j=0}^{N-1} T_j \quad , \quad T_{sum} = \sum_{i=0}^{N-1} |T_i - \bar{T}|^2$$

and observe:

$$\begin{aligned} PVI(\vec{T}) &= 1000 \cdot \frac{\frac{1}{N} \sum_{i=0}^{N-1} \left| T_i - \frac{1}{N} \sum_{j=0}^{N-1} T_j \right|^2}{\left( \frac{1}{N} \sum_{j=0}^{N-1} T_j \right)^2} \\ &= 1000 \cdot \frac{\frac{1}{N} \sum_{i=0}^{N-1} |T_i - \bar{T}|^2}{(\bar{T})^2} \\ &= 1000 \cdot \frac{\frac{1}{N} T_{sum}}{(\bar{T})^2} \end{aligned}$$

As neither  $T_{sum}$  nor  $\bar{T}$  depend on the order of  $\vec{T}$  this is also true for  $PVI$ .

$$b) \quad AVI(\vec{A}) = \log_{10} \left( PVI(\vec{A}) \right).$$

Thus  $AVI(\vec{A})$  is independent of the order of the elements in  $\vec{A}$  as well.
